# Supplementary material for: Polyelectrolyte‐Enrobed Cancer Cells in View of Personalized Immune‐Therapy
Source: PubMed Central journal article supplement (PMC5473321; doi:10.1002/advs.201700050), 2017-05-02
Supplement: ADVS-4-na-s001.pdf [file ADVS-4-na-s001.pdf]

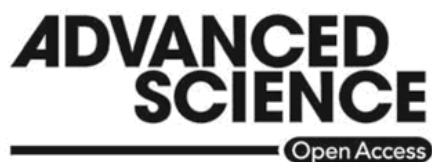

## Supporting Information

for *Adv. Sci.*, DOI: 10.1002/adv.201700050

### Polyelectrolyte-Enrobed Cancer Cells in View of Personalized Immune-Therapy

*Lien Lybaert, Keun Ah Ryu, Riet De Rycke, Alfred C. Chon, Olivier De Wever, Karim Y. Vermaelen, Aaron Esser-Kahn,\* and Bruno G. De Geest\**

## SUPPORTING INFORMATION

### Polyelectrolyte-enrobed cancer cells in view of personalized immune-therapy.

L. Lybaert<sup>1</sup>, Keun Ah Ryu<sup>2</sup>, Riet De Rycke<sup>3,4</sup>, Alfred Chon<sup>2</sup>, Olivier De Wever<sup>5</sup>, Karim Y. Vermaelen<sup>6</sup>, Aaron Esser-Kahn<sup>2\*</sup> and Bruno G. De Geest<sup>1\*</sup>

- 1 Department of Pharmaceutics, Ghent University, Ghent, Belgium
- 2 Department of Chemistry, University of California, Irvine (CA), USA
- 3 VIB Inflammation Research Center, Ghent University, Ghent, Belgium and Department of Biomedical Molecular Biology, Ghent University, 9052 Ghent, Belgium
- 4 Department of Plant Systems Biology, VIB, Ghent, Belgium and Department of Plant Biotechnology and Bioinformatics, Ghent University, 9052 Gent, Belgium
- 5 Laboratory of Experimental Cancer Research, Ghent University, Ghent, Belgium
- 6 Tumor Immunology Laboratory, Department of Respiratory Medicine, Ghent University Hospital, Ghent, Belgium
- \* Coresponding authors: [aesserka@uci.edu](mailto:aesserka@uci.edu), [br.degeest@ugent.be](mailto:br.degeest@ugent.be)

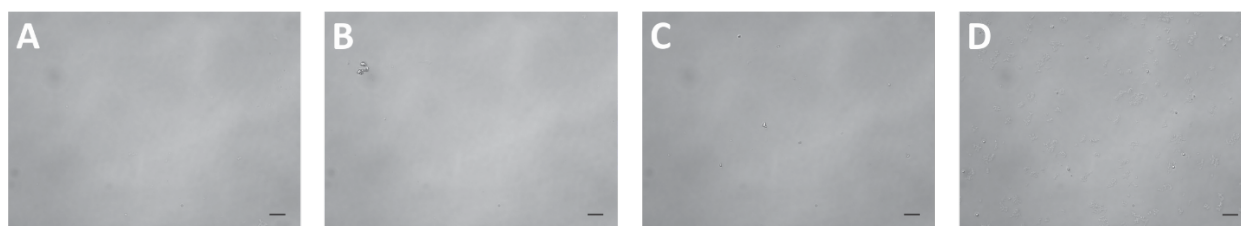

**Figure S1.** Microscopic imaging of spray dried control samples containing. (A) only cell material. (B) cell material and mannitol. (C) cell material, mannitol and dextran sulfate. (D) cell material, mannitol and poly-L-arginine. Scale bar is 10  $\mu\text{m}$ .
